# Supplementary material for: The Contribution of Germline Predisposition Gene Mutations to Clinical Subtypes of Invasive Breast Cancer From a Clinical Genetic Testing Cohort
Source: PubMed Central journal article supplement — J Natl Cancer Inst. 2020 Apr 24;112(12):1231–41. doi: 10.1093/jnci/djaa023 (PMC7735776; doi:10.1093/jnci/djaa023), 2020-04-24
Supplement: djaa023_supplementary_data.pdf [file djaa023_supplementary_data.pdf]

## SUPPLEMENTARY MATERIALS

### Supplementary Methods

#### ***Clinical Cohort Study Population***

A total of 54,555 invasive breast cancer patients with available information on pathological characteristics of 56,480 breast tumors among all individuals subjected to clinical germline cancer panel testing between March 2012 and December 2016 at a clinical testing laboratory (Ambry Genetics-Aliso Viejo, CA) were included in this study. Demographic, clinical history, and family history of cancer information was collected from test requisition forms, clinic notes, and pedigrees provided by ordering clinicians at the time of testing. Information was collected on current age, personal history and age at diagnosis of all cancers, ancestry, family history of cancer with cancer type, and age at diagnosis among relatives. Family history was limited to first and second-degree relatives. Families with breast or ovarian cancer in two or more individuals, on the same parental side, were considered positive for family history for each cancer. Estrogen receptor (ER), progesterone receptor (PR), and HER2 status of each breast cancer was provided by ordering clinicians and/or clinical tumor pathology reports.

To assess data quality, a review of a random sample of 1200 (10.0%) breast and ovarian cancer patient intake forms was conducted. Of these, 43.3% with additional clinical history documentation available (clinic notes, pedigrees, detailed letters of medical necessity). Consistent information was observed for breast cancers, with age at breast cancer diagnosis available for 99.5%, ER status for 99.5%, PR status for 98.8%, and HER2 status for 96.3%, suggesting that the intake data for the cohort is of reasonably high quality.

#### ***Multigene Panel Testing for the Clinical Cohort***

Mutation testing was performed by sequencing of targeted custom capture products from several clinical multigene panels and targeted chromosomal microarray analysis. Genomic deoxyribonucleic acid (gDNA) was isolated from the patient's blood or saliva specimen using a standardized methodology (Qiagen, Valencia, CA). Sequence enrichment was performed by incorporating the gDNA onto microfluidics chip or into microdroplets along with primer pairs or by a bait-capture methodology using long biotinylated oligonucleotide probes (RainDance Technologies, Billerica, MA or Integrated DNA Technologies, San Diego, CA), followed by PCR and then NGS analysis (Illumina, San Diego, CA) of all coding exons plus at least five bases into the 5' and 3' ends of all the introns and untranslated regions (5'UTR and 3'UTR). A targeted chromosomal microarray was used for the detection of gross deletions and duplications for all genes except *PMS2* (Agilent, Santa Clara, CA). Gross deletion/duplication analysis of *PMS2* was performed using MLPA kit# P008-B1 (MRC-Holland, Amsterdam, Netherlands) and Sanger sequencing. Initial data processing and base calling was done using RTA 1.12.4 (HiSeq Control Software 1.4.5; Illumina). Sequence quality filtering at Q20 was executed with the CASAVA software (version 1.8.2; Illumina, Hayward, CA). Sequence fragments were aligned to the reference human genome (GRCh37), and variant calls were generated using CASAVA. Variants were annotated with the Ambry Variant Analyzer, a proprietary alignment and variant annotation software (Ambry Genetics). All variants identified by Ambry Genetics are submitted to the ClinVar public database.

### **Absolute Risk Estimation for Breast Cancer and pathology subtype from the Clinical Cohort**

Absolute risk is the probability an individual with a measured set of risk factors (e.g. mutation status, a Polygenic Risk Score (PRS), and family history of disease) and is disease free at age  $a$  will be diagnosed with the disease in the subsequent  $\tau$  years<sup>1</sup>. Let  $Z$  be the set of measured risk factors, then we can express the absolute risk as:

$$R(a, \tau, Z) = \int_a^{a+\tau} h_1(u|Z) \times \exp\left(-\int_a^u \{h_1(v|Z) + h_2(v|Z)\} dv\right) du$$

where  $h_1(a|Z)$  is the conditional disease-specific hazard at age  $a$  and  $h_2(a|Z)$  is the competing risks hazard at age  $a$ . The competing risks may include other diseases or death. The hazards can be parameterized as:

$$h_1(a|Z) = h_{10}(a)\exp(\beta Z)$$

and

$$h_2(a|Z) = h_{20}(a)\exp(\gamma Z)$$

where  $h_{i0}(a)$  is the baseline hazard and  $\beta$  and  $\gamma$  represent the relative risks for each risk factor in  $Z$  for the disease of interest and competing risks, respectively. Estimates for  $\beta$  and  $\gamma$  can be estimated from the case-control data. The baseline hazards can be estimated by the following relationship between the baseline hazard and the marginal hazard

$$h_1^*(a) = h_{10}(a)E(\exp(\beta Z)) \approx \int h_{10}(a)\exp(\beta z)dF(z)$$

where  $F(Z)$  denotes the distribution of the risk factors in the population. For each age, we solve for  $h_{10}(a)$  by using the expected distribution of the risk factor in the population<sup>2,3</sup>.

We estimated the breast cancer subtype absolute risk for a women at age  $a$  without a diagnosis with any breast cancer, and the risk factor of interest being gene specific mutation carrier status, the odds ratio estimates from the Ambry cases versus gnomAD controls were used as estimates for  $\beta$ , and SEER subtype specific incidence rates<sup>4</sup> were utilized for the estimation of the baseline hazard combined with the gnomAD mutation frequency for the population frequency. The age-specific competing hazards model,  $h_2(a|Z)$ , involves a mixture of the hazard for all other breast cancer subtypes and death. The hazard function for all cause mortality was estimated using US mortality data subset to the same states as the SEER registries. Confidence bands for the absolute risk curve were estimated by utilizing the upper and lower 95% confidence interval for the gene specific odds ratio and treating the incidence rates from SEER as known rates.

## References

1. Gail MH, Brinton LA, Byar DP, et al. Projecting individualized probabilities of developing breast cancer for white females who are being examined annually. *J Natl Cancer Inst.* 1989;81(24):1879-1886.
2. Costantino JP, Gail MH, Pee D, et al. Validation studies for models projecting the risk of invasive and total breast cancer incidence. *J Natl Cancer Inst.* 1999;91(18):1541-1548.
3. Chatterjee N, Shi J, Garcia-Closas M. Developing and evaluating polygenic risk prediction models for stratified disease prevention. *Nat Rev Genet.* 2016;17(7):392-406.
4. National Cancer Institute, DCCPS, Surveillance Research Program, Surveillance Systems Branch. Surveillance, Epidemiology, and End Results (SEER) Program Research Data (1973-2014). <https://www.seer.cancer.gov>. April 2017 (Based on November 2016 Submission).

**Supplementary Table 1: Characteristics of study population and comparison between mutation carriers and non-mutation carriers**

| Characteristics                              | All patients<br>(54555) | Mutation carriers<br>(4451) | Non-mutation carriers<br>(50104) | p value* |
|----------------------------------------------|-------------------------|-----------------------------|----------------------------------|----------|
| <b>Mean age (SD), y</b>                      | 49.5 (11.4)             | 46.7 (11.5)                 | 49.8 (11.4)                      | <0.001   |
| <b>Race and ethnicity</b>                    |                         |                             |                                  | 0.05     |
| Black                                        | 4392 (8.1%)             | 396 (8.9%)                  | 3996 (8.0%)                      |          |
| Caucasian                                    | 34880 (63.9%)           | 2787 (62.6%)                | 32093 (64.1%)                    |          |
| Ashkenazi Jews                               | 2623 (4.3%)             | 220 (4.9%)                  | 2403 (4.8%)                      |          |
| Asian                                        | 2608 (4.8%)             | 194 (4.4%)                  | 2414 (4.8%)                      |          |
| Hispanic                                     | 3174 (5.8%)             | 287 (6.4%)                  | 2887 (5.8%)                      |          |
| Other/unknown                                | 6878 (12.6%)            | 567 (12.7%)                 | 6311(12.6%)                      |          |
| <b>Personal cancer history</b>               |                         |                             |                                  |          |
| Breast Cancer                                |                         |                             |                                  |          |
| age at diagnosis                             |                         |                             |                                  | <0.001   |
| 18-36                                        | 6629 (12.2%)            | 905 (20.4%)                 | 5724 (11.5%)                     |          |
| 37-45                                        | 14622 (26.8%)           | 1239 (27.9%)                | 13383 (26.8%)                    |          |
| 46-50                                        | 10399 (19.1%)           | 760 (17.1%)                 | 9639 (19.3%)                     |          |
| 51-60                                        | 13162 (24.1%)           | 981 (22.1%)                 | 12181 (24.4%)                    |          |
| >60                                          | 9570 (17.5%)            | 554 (12.5%)                 | 9016 (18.1%)                     |          |
| Multiple Breast Cancer                       | 5254 (9.6%)             | 648 (14.6%)                 | 5474 (10.9%)                     | <0.001   |
| Ovarian Cancer                               | 701 (1.3%)              | 130 (2.9%)                  | 571 (1.1%)                       | <0.001   |
| Pancreatic Cancer                            | 124 (0.2%)              | 28 (0.6%)                   | 96 (0.2%)                        | <0.001   |
| Colorectal Cancer                            | 613 (1.1%)              | 47 (1.1%)                   | 566 (1.1%)                       | 0.66     |
| Uterine/endometrial Cancer                   | 784 (1.4%)              | 83 (1.9%)                   | 701 (1.4%)                       | 0.01     |
| <b>Family History (1st &amp; 2nd degree)</b> |                         |                             |                                  |          |
| Breast Cancer                                | 32390 (59.4%)           | 2858 (66.9%)                | 29532 (61.9%)                    | <0.001   |
| Ovarian Cancer                               | 6486 (11.9%)            | 681 (15.9%)                 | 5805 (12.2%)                     | <0.001   |
| Pancreatic Cancer                            | 5036 (9.2%)             | 471 (11.0%)                 | 4565 (9.6%)                      | 0.002    |
| Colorectal Cancer                            | 12121 (22.2%)           | 986 (23.1%)                 | 11135 (23.3%)                    | 0.70     |
| Uterine/endometrial Cancer                   | 3698 (6.8%)             | 281 (6.6%)                  | 3417 (7.2%)                      | 0.15     |
| <b>Tumor subtype†</b>                        |                         |                             |                                  | <0.001   |
| ER+/HER2-                                    | 26620 (58.0%)           | 1861 (50.0%)                | 24759 (58.7%)                    |          |
| ER+/HER2+                                    | 5979 (13.0%)            | 424 (11.4%)                 | 5555 (13.2%)                     |          |
| ER-/HER2+                                    | 2701 (5.9%)             | 173 (4.6%)                  | 2528 (6.0%)                      |          |
| ER-/HER2-                                    | 10621 (23.1%)           | 1265 (34.0%)                | 9356 (22.2%)                     |          |
| TNBC (ER-/PR-/HER2-)                         | 10292 (22.4%)           | 1229 (33.0%)                | 9063 (21.5%)                     |          |

\*: For continuous variable (age), ANOVA p value was provided; for categorical variables, Chi-Square test p value was provided.

†: Includes first primary breast tumors and all synchronous breast tumors (excludes second/asynchronous breast tumors).

**Supplementary Table 2. Concordance of clinical pathology subtype for patients with multiple breast tumors**

| All cases with multiple breast cancer |           | Second BC pathology |           |           |      |     |
|---------------------------------------|-----------|---------------------|-----------|-----------|------|-----|
|                                       |           | ER+/HER2-           | ER+/HER2+ | ER-/HER2+ | TNBC | NA  |
| First BC pathology                    | ER+/HER2- | 1643                | 88        | 52        | 115  | 500 |
|                                       | ER+/HER2+ | 96                  | 186       | 17        | 20   | 99  |
|                                       | ER-/HER2+ | 33                  | 15        | 62        | 29   | 53  |
|                                       | TNBC      | 175                 | 28        | 17        | 466  | 214 |
|                                       | NA        | 234                 | 34        | 21        | 111  | 946 |

Krippendorff's alpha = 0.58

| Mutation carriers with multiple breast cancer* |           | Second BC pathology |           |           |      |    |
|------------------------------------------------|-----------|---------------------|-----------|-----------|------|----|
|                                                |           | ER+/HER2-           | ER+/HER2+ | ER-/HER2+ | TNBC | NA |
| First BC pathology                             | ER+/HER2- | 46                  | 10        | 2         | 9    | 16 |
|                                                | ER+/HER2+ | 8                   | 9         | 1         | 3    | 4  |
|                                                | ER-/HER2+ | 0                   | 0         | 1         | 1    | 0  |
|                                                | TNBC      | 14                  | 0         | 0         | 34   | 14 |
|                                                | NA        | 9                   | 2         | 0         | 10   | 31 |

| Non-mutation carriers with multiple breast cancer |           | Second BC pathology |           |           |      |     |
|---------------------------------------------------|-----------|---------------------|-----------|-----------|------|-----|
|                                                   |           | ER+/HER2-           | ER+/HER2+ | ER-/HER2+ | TNBC | NA  |
| First BC pathology                                | ER+/HER2- | 625                 | 34        | 14        | 46   | 171 |
|                                                   | ER+/HER2+ | 36                  | 55        | 3         | 7    | 34  |
|                                                   | ER-/HER2+ | 13                  | 6         | 22        | 11   | 14  |
|                                                   | TNBC      | 69                  | 14        | 5         | 136  | 67  |
|                                                   | NA        | 102                 | 14        | 10        | 44   | 341 |

Krippendorff's alpha = 0.54

NA: Not available.

\*: number is too small to calculate a Krippendorff alpha value.

**Supplementary Table 3: Frequency of mutations in cancer predisposition genes by breast cancer clinical tumor subtype based on ER and HER2 status**

| Gene          | ER+/HER2-    |            |          | ER+/HER2+    |            |          | ER-/HER2+    |            |          | ER-/HER2-    |            |          | Het*    |
|---------------|--------------|------------|----------|--------------|------------|----------|--------------|------------|----------|--------------|------------|----------|---------|
|               | No. mutation | No. tested | Freq (%) | No. mutation | No. tested | Freq (%) | No. mutation | No. tested | Freq (%) | No. mutation | No. tested | Freq (%) | p value |
| <b>ATM</b>    | 179          | 15882      | 1.1      | 59           | 3507       | 1.7      | 17           | 1586       | 1.1      | 15           | 6304       | 0.2      | < 0.001 |
| <b>BARD1</b>  | 24           | 14778      | 0.2      | 7            | 3280       | 0.2      | 5            | 1480       | 0.3      | 53           | 5838       | 0.9      | < 0.001 |
| <b>BRCA1</b>  | 185          | 20275      | 0.9      | 32           | 4562       | 0.7      | 37           | 2030       | 1.8      | 546          | 8160       | 6.7      | < 0.001 |
| <b>BRCA2</b>  | 424          | 20275      | 2.1      | 76           | 4562       | 1.7      | 26           | 2030       | 1.3      | 221          | 8160       | 2.7      | < 0.001 |
| <b>BRIP1</b>  | 43           | 14825      | 0.3      | 8            | 3285       | 0.2      | 1            | 1484       | 0.1      | 27           | 5848       | 0.5      | 0.05    |
| <b>CDH1</b>   | 22           | 19795      | 0.1      | 2            | 4464       | 0.0      | 1            | 1985       | 0.1      | 4            | 7973       | 0.1      | 0.31    |
| <b>CHEK2</b>  | 305          | 15864      | 1.9      | 81           | 3502       | 2.3      | 17           | 1583       | 1.1      | 25           | 6287       | 0.4      | < 0.001 |
| <b>MSH6</b>   | 24           | 9146       | 0.3      | 6            | 1885       | 0.3      | 1            | 851        | 0.1      | 9            | 3330       | 0.3      | 0.79    |
| <b>NBN</b>    | 40           | 14778      | 0.3      | 7            | 3280       | 0.2      | 2            | 1480       | 0.1      | 12           | 5838       | 0.2      | 0.81    |
| <b>NF1</b>    | 16           | 14554      | 0.1      | 7            | 3219       | 0.2      | 2            | 1456       | 0.1      | 11           | 5749       | 0.2      | 0.39    |
| <b>PALB2</b>  | 155          | 16844      | 0.9      | 26           | 3733       | 0.7      | 8            | 1667       | 0.5      | 95           | 6706       | 1.4      | < 0.001 |
| <b>PTEN</b>   | 17           | 20314      | 0.1      | 2            | 4572       | 0.0      | 2            | 2034       | 0.1      | 3            | 8165       | 0.0      | 0.43    |
| <b>RAD51C</b> | 24           | 14825      | 0.26     | 3            | 3285       | 0.19     | 4            | 1484       | 0.3      | 26           | 5848       | 0.4      | 0.002   |
| <b>RAD51D</b> | 8            | 14601      | 0.1      | 1            | 3224       | 0.0      | 1            | 1460       | 0.1      | 15           | 5759       | 0.3      | 0.001   |
| <b>TP53</b>   | 25           | 20356      | 0.1      | 19           | 4581       | 0.4      | 13           | 2037       | 0.6      | 9            | 8186       | 0.1      | <0.001  |
| Total         |              |            | 8.6      |              |            | 8.9      |              |            | 7.7      |              |            | 14.4     |         |

ER: estrogen receptor; HER2: human epidermal growth factor 2-neu; Freq: mutation frequency. \*: Het: Heterogeneity analysis using General Linear Regression analysis adjusted for age at diagnosis and race and ethnicity.

**Supplementary Table 4: Frequency of mutations in cancer predisposition genes by breast cancer clinical subtype in non-Hispanic whites**

| Gene          | ER+/HER2-    |            |          | ER+/HER2+    |            |          | ER-/HER2+    |            |          | TNBC         |            |          | Het*    |
|---------------|--------------|------------|----------|--------------|------------|----------|--------------|------------|----------|--------------|------------|----------|---------|
|               | No. mutation | No. tested | Freq (%) | No. mutation | No. tested | Freq (%) | No. mutation | No. tested | Freq (%) | No. mutation | No. tested | Freq (%) | p value |
| <i>ATM</i>    | 120          | 10542      | 1.1      | 36           | 2177       | 1.7      | 13           | 950        | 1.4      | 10           | 3571       | 0.3      | < 0.001 |
| <i>BARD1</i>  | 14           | 9881       | 0.1      | 7            | 2045       | 0.3      | 3            | 895        | 0.3      | 29           | 3308       | 0.9      | < 0.001 |
| <i>BRCA1</i>  | 102          | 13442      | 0.8      | 18           | 2823       | 0.6      | 23           | 1209       | 1.9      | 273          | 4561       | 6.0      | < 0.001 |
| <i>BRCA2</i>  | 243          | 13442      | 1.8      | 39           | 2823       | 1.4      | 13           | 1209       | 1.1      | 117          | 4561       | 2.6      | < 0.001 |
| <i>BRIP1</i>  | 31           | 9916       | 0.3      | 5            | 2049       | 0.2      | 1            | 897        | 0.1      | 16           | 3316       | 0.5      | 0.23    |
| <i>CDH1</i>   | 14           | 13110      | 0.1      | 2            | 2756       | 0.1      | 1            | 1182       | 0.1      | 1            | 4448       | 0.0      | 0.39    |
| <i>CHEK2</i>  | 235          | 10533      | 2.2      | 65           | 2174       | 3.0      | 13           | 949        | 1.4      | 15           | 3558       | 0.4      | < 0.001 |
| <i>MSH6</i>   | 15           | 6143       | 0.2      | 5            | 1214       | 0.4      | 1            | 525        | 0.2      | 7            | 1905       | 0.4      | 0.67    |
| <i>NBN</i>    | 31           | 9881       | 0.3      | 5            | 2045       | 0.2      | 1            | 895        | 0.1      | 10           | 3308       | 0.3      | 0.70    |
| <i>NF1</i>    | 9            | 9713       | 0.1      | 5            | 2002       | 0.3      | 1            | 874        | 0.1      | 11           | 3246       | 0.3      | 0.04    |
| <i>PALB2</i>  | 90           | 11145      | 0.8      | 9            | 2304       | 0.4      | 5            | 991        | 0.5      | 54           | 3775       | 1.4      | < 0.001 |
| <i>PTEN</i>   | 12           | 13477      | 0.1      | 1            | 2830       | 0.0      | 1            | 1213       | 0.1      | 0            | 4565       | 0.0      | 0.05    |
| <i>RAD51C</i> | 16           | 9916       | 0.2      | 2            | 2049       | 0.1      | 4            | 897        | 0.5      | 13           | 3316       | 0.4      | 0.03    |
| <i>RAD51D</i> | 4            | 9748       | 0.0      | 1            | 2006       | 0.1      | 1            | 876        | 0.1      | 7            | 3254       | 0.2      | 0.05    |
| <i>TP53</i>   | 14           | 13502      | 0.1      | 12           | 2837       | 0.4      | 6            | 1215       | 0.5      | 6            | 4580       | 0.1      | 0.02    |
| Total         |              |            | 8.4      |              |            | 9.2      |              |            | 8.3      |              |            | 13.8     |         |

ER: estrogen receptor; HER2: human epidermal growth factor 2-neu; Freq: mutation frequency. \*: Het: Heterogeneity analysis using General Linear Regression analysis adjusted for age at diagnosis.

**Supplementary Table 5. Frequency of mutations in cancer predisposition genes by clinical pathology tumor subtype and heterogeneity analysis subset to single primary breast cancer cases**

| Gene          | Overall      |            |          | ER+/HER2-    |            |          | ER+/HER2+    |            |          | ER-/HER2+    |            |          | TNBC         |            |          | Het*    |
|---------------|--------------|------------|----------|--------------|------------|----------|--------------|------------|----------|--------------|------------|----------|--------------|------------|----------|---------|
|               | No. mutation | No. tested | Freq (%) | No. mutation | No. tested | Freq (%) | No. mutation | No. tested | Freq (%) | No. mutation | No. tested | Freq (%) | No. mutation | No. tested | Freq (%) | p value |
| <b>ATM</b>    | 312          | 29231      | 1.1      | 156          | 13917      | 1.1      | 51           | 3190       | 1.6      | 13           | 1447       | 0.9      | 12           | 5564       | 0.2      | < 0.001 |
| <b>BARD1</b>  | 81           | 27199      | 0.3      | 20           | 12927      | 0.2      | 3            | 2981       | 0.1      | 5            | 1348       | 0.4      | 47           | 5150       | 0.9      | < 0.001 |
| <b>BRCA1</b>  | 776          | 37880      | 2.1      | 149          | 17826      | 0.8      | 28           | 4157       | 0.7      | 31           | 1858       | 1.7      | 439          | 7186       | 6.1      | < 0.001 |
| <b>BRCA2</b>  | 833          | 37880      | 2.2      | 373          | 17826      | 2.1      | 68           | 4157       | 1.6      | 24           | 1858       | 1.3      | 185          | 7186       | 2.6      | < 0.001 |
| <b>BRIP1</b>  | 87           | 27269      | 0.3      | 40           | 12972      | 0.3      | 8            | 2986       | 0.3      | 1            | 1352       | 0.1      | 24           | 5160       | 0.5      | 0.12    |
| <b>CDH1</b>   | 32           | 37007      | 0.1      | 20           | 17386      | 0.1      | 2            | 4067       | 0.1      | 1            | 1814       | 0.1      | 3            | 7028       | 0.0      | 0.31    |
| <b>CHEK2</b>  | 457          | 29178      | 1.6      | 258          | 13899      | 1.9      | 67           | 3185       | 2.1      | 17           | 1444       | 1.2      | 23           | 5551       | 0.4      | < 0.001 |
| <b>MSH6</b>   | 40           | 16464      | 0.2      | 20           | 8083       | 0.3      | 4            | 1716       | 0.2      | 1            | 783        | 0.1      | 9            | 2936       | 0.3      | 0.88    |
| <b>NBN</b>    | 63           | 27199      | 0.2      | 31           | 12927      | 0.2      | 5            | 2981       | 0.2      | 2            | 1348       | 0.2      | 11           | 5150       | 0.2      | 0.88    |
| <b>NF1</b>    | 35           | 26744      | 0.1      | 13           | 12745      | 0.1      | 7            | 2928       | 0.2      | 2            | 1326       | 0.2      | 8            | 5075       | 0.2      | 0.47    |
| <b>PALB2</b>  | 313          | 31069      | 1.0      | 136          | 14778      | 0.9      | 20           | 3395       | 0.6      | 4            | 1520       | 0.3      | 86           | 5922       | 1.5      | < 0.001 |
| <b>PTEN</b>   | 20           | 37946      | 0.1      | 11           | 17854      | 0.1      | 1            | 4166       | 0.0      | 2            | 1861       | 0.1      | 3            | 7192       | 0.0      | 0.49    |
| <b>RAD51C</b> | 60           | 27269      | 0.2      | 21           | 12972      | 0.2      | 2            | 2986       | 0.1      | 4            | 1352       | 0.3      | 25           | 5160       | 0.5      | 0.001   |
| <b>RAD51D</b> | 26           | 26814      | 0.1      | 6            | 12790      | 0.1      | 1            | 2933       | 0.0      | 1            | 1330       | 0.1      | 13           | 5085       | 0.3      | 0.005   |
| <b>TP53</b>   | 62           | 38040      | 0.2      | 16           | 17895      | 0.1      | 16           | 4175       | 0.4      | 11           | 1864       | 0.6      | 8            | 7209       | 0.1      | 0.001   |
| Total         |              |            | 9.7      |              |            | 8.4      |              |            | 8.2      |              |            | 7.3      |              |            | 13.8     |         |

ER: estrogen receptor; HER2: human epidermal growth factor 2-neu; TNBC: ER-PR-HER2- (PR: progesterone receptor); Freq: mutation frequency.

\*: Het: Heterogeneity analysis using Generalized Linear regression test adjusted for age at diagnosis and race and ethnicity.



**Supplementary Table 6: Associations between gene-specific mutations and breast cancer with ER status and HER2 status\***

| Gene          | ER+ vs. ER- |            |         | HER2+ vs. HER2- |            |         | Interaction of ER & HER2 status |             |         |
|---------------|-------------|------------|---------|-----------------|------------|---------|---------------------------------|-------------|---------|
|               | OR          | 95% C.I.   | p value | OR              | 95% C.I.   | p value | OR                              | 95% C.I.    | p value |
| <i>ATM</i>    | 4.87        | 2.97-8.61  | < 0.001 | 4.07            | 2.00-8.35  | < 0.001 | 0.34                            | 0.16-0.74   | 0.006   |
| <i>BARD1</i>  | 0.18        | 0.11-0.29  | < 0.001 | 0.37            | 0.13-0.83  | 0.03    | 3.53                            | 1.02-13.05  | 0.05    |
| <i>BRCA1</i>  | 0.13        | 0.11-0.16  | < 0.001 | 0.21            | 0.15-0.29  | < 0.001 | 2.69                            | 1.61-4.47   | < 0.001 |
| <i>BRCA2</i>  | 0.80        | 0.68-0.94  | 0.007   | 0.42            | 0.28-0.63  | < 0.001 | 1.61                            | 1.01-2.64   | 0.05    |
| <i>BRIP1</i>  | 0.62        | 0.39-1.02  | 0.05    | 0.15            | 0.008-0.70 | 0.06    | 5.86                            | 0.99-111.96 | 0.10    |
| <i>CDH1</i>   | 2.06        | 0.79-7.08  | 0.19    | 1.05            | 0.05-7.12  | 0.96    | 0.43                            | 0.03-10.65  | 0.53    |
| <i>CHEK2</i>  | 4.89        | 3.32-7.56  | < 0.001 | 2.67            | 1.42-4.93  | 0.002   | 0.44                            | 0.23-0.87   | 0.02    |
| <i>MSH6</i>   | 0.96        | 0.46-2.19  | 0.92    | 0.45            | 0.024-2.39 | 0.45    | 2.83                            | 0.40-57.44  | 0.37    |
| <i>NBN</i>    | 1.30        | 0.70-2.59  | 0.43    | 0.68            | 0.11-2.49  | 0.61    | 1.22                            | 0.25-8.97   | 0.82    |
| <i>NF1</i>    | 0.58        | 0.27-1.30  | 0.17    | 0.69            | 0.11-2.58  | 0.63    | 2.69                            | 0.53-20.44  | 0.27    |
| <i>PALB2</i>  | 0.66        | 0.51-0.86  | 0.002   | 0.33            | 0.15-0.64  | 0.003   | 2.19                            | 0.99-5.36   | 0.07    |
| <i>PTEN</i>   | 2.38        | 0.80-10.20 | 0.17    | 2.41            | 0.32-14.62 | 0.34    | 0.18                            | 0.02-1.99   | 0.15    |
| <i>RAD51C</i> | 0.36        | 0.20-0.63  | < 0.001 | 0.62            | 0.18-1.60  | 0.38    | 0.95                            | 0.17-4.75   | 0.95    |
| <i>RAD51D</i> | 0.21        | 0.08-0.48  | < 0.001 | 0.27            | 0.02-1.35  | 0.21    | 2.22                            | 0.08-61.34  | 0.59    |
| <i>TP53</i>   | 1.31        | 0.63-2.98  | 0.49    | 4.64            | 2.0-11.30  | < 0.001 | 0.46                            | 0.16-1.29   | 0.14    |

\*: Logistic regression analysis for main and interaction effect of ER and HER2 status, adjusted for age at diagnosis of breast cancer.

OR: odds ratio; 95% CI: 95% confidence interval

**Supplementary Table 7: Pairwise enrichment of gene-specific mutations between clinical pathology subtypes\***

| Gene          | ER+/HER2+ vs ER+/HER2- |         | ER-/HER2+ vs ER+/HER2- |         | ER-/HER2+ vs ER+/HER2+ |         | TNBC vs ER+/HER2-    |         | TNBC vs ER-/HER2+   |         | TNBC vs ER+/HER2+     |         |
|---------------|------------------------|---------|------------------------|---------|------------------------|---------|----------------------|---------|---------------------|---------|-----------------------|---------|
|               | OR (95%CI)             | p value | OR (95% CI)            | p value | OR (95% CI)            | p value | OR (95% CI)          | p value | OR (95% CI)         | p value | OR (95% CI)           | p value |
| <b>ATM</b>    | 1.40<br>(1.04-1.89)    | 0.03    | 0.85<br>(0.51-1.42)    | 0.53    | 0.61<br>(0.35-1.06)    | 0.08    | 0.19<br>(0.11-0.33)  | <0.001  | 0.22<br>(0.11-0.46) | <0.001  | 0.13<br>(0.07-0.25)   | <0.001  |
| <b>BARD1</b>  | 1.31<br>(0.56-3.06)    | 0.53    | 2.06<br>(0.78-5.43)    | 0.14    | 1.57<br>(0.50-4.96)    | 0.44    | 5.68<br>(3.49-9.27)  | <0.001  | 2.76<br>(1.10-6.92) | 0.03    | 4.33<br>(1.96-9.57)   | <0.001  |
| <b>BRCA1</b>  | 0.58<br>(0.40-0.85)    | 0.005   | 1.60<br>(1.12-2.28)    | 0.01    | 2.75<br>(1.71-4.44)    | <0.001  | 7.68<br>(6.46-9.13)  | <0.001  | 4.82<br>(3.43-6.77) | <0.001  | 13.25<br>(9.24-19.02) | <0.001  |
| <b>BRCA2</b>  | 0.68<br>(0.53-0.87)    | 0.002   | 0.53<br>(0.35-0.78)    | 0.002   | 0.78<br>(0.50-1.22)    | 0.27    | 1.21<br>(1.02-1.43)  | 0.03    | 2.30<br>(1.53-3.47) | <0.001  | 1.79<br>(1.37-2.33)   | <0.001  |
| <b>BRIP1</b>  | 0.87<br>(0.41-1.86)    | 0.72    | 0.24<br>(0.03-1.74)    | 0.16    | 0.28<br>(0.03-2.20)    | 0.22    | 1.55<br>(0.94-2.55)  | 0.08    | 6.52<br>(4.52-9.41) | <0.001  | 1.78<br>(0.80-3.97)   | 0.16    |
| <b>CHEK2</b>  | 1.19<br>(0.93-1.53)    | 0.16    | 0.58<br>(0.35-0.94)    | 0.03    | 0.48<br>(0.29-0.82)    | 0.007   | 0.22<br>(0.14-0.33)  | <0.001  | 0.38<br>(0.20-0.70) | 0.002   | 0.18<br>(0.11-0.29)   | <0.001  |
| <b>PALB2</b>  | 0.72<br>(0.47-1.09)    | 0.12    | 0.49<br>(0.24-0.99)    | 0.05    | 0.68<br>(0.31-1.50)    | 0.34    | 1.46<br>(1.12-1.90)  | 0.005   | 3.01<br>(1.46-6.21) | 0.003   | 2.04<br>(1.31-3.17)   | 0.001   |
| <b>RAD51C</b> | 0.61<br>(0.19-2.02)    | 0.42    | 1.76<br>(0.61-5.09)    | 0.30    | 2.92<br>(0.65-13.05)   | 0.16    | 2.82<br>(1.60-4.95)  | <0.001  | 1.61<br>(0.56-4.63) | 0.37    | 4.70<br>(1.42-15.58)  | 0.01    |
| <b>RAD51D</b> | 0.61<br>(0.08-4.90)    | 0.64    | 1.35<br>(0.17-10.93)   | 0.78    | 2.21<br>(0.71-6.82)    | 0.17    | 4.77<br>(1.97-11.58) | 0.001   | 3.50<br>(1.48-8.27) | 0.004   | 7.79<br>(3.30-18.39)  | <0.001  |
| <b>TP53</b>   | 2.26<br>(1.23-4.15)    | 0.008   | 3.68<br>(1.86-7.28)    | <0.001  | 1.63<br>(0.80-3.31)    | 0.18    | 0.84<br>(0.39-1.82)  | 0.66    | 0.23<br>(0.10-0.54) | <0.001  | 0.37<br>(0.17-0.83)   | 0.02    |

\*: Polytomous regression analysis adjusted for age at diagnosis and racial/ethnic group.

OR: odds ratio; 95% CI: 95% confidence interval

**Supplementary Table 8: Enrichment analysis of gene-specific mutations between each clinical pathologic subtype in non-Hispanic whites\***

| Gene          | ER+/HER2+ vs ER+/HER2- |         | ER-/HER2+ vs ER+/HER2- |         | ER-/HER2+ vs ER+/HER2+ |         | TNBC vs ER+/HER2-    |         | TNBC vs ER-/HER2+    |         | TNBC vs ER+/HER2+     |         |
|---------------|------------------------|---------|------------------------|---------|------------------------|---------|----------------------|---------|----------------------|---------|-----------------------|---------|
|               | OR (95% CI)            | p value | OR (95% CI)            | p value | OR (95% CI)            | p value | OR (95% CI)          | p value | OR (95% CI)          | p value | OR (95% CI)           | p value |
| <b>ATM</b>    | 1.36<br>(0.93-2.00)    | 0.11    | 1.18<br>(0.67-2.09)    | 0.57    | 0.84<br>(0.44-1.59)    | 0.59    | 0.24<br>(0.13-0.46)  | <0.001  | 0.21<br>(0.09-0.48)  | <0.001  | 0.18<br>(0.09-0.36)   | <0.001  |
| <b>BARD1</b>  | 2.45<br>(0.98-6.11)    | 0.05    | 2.41<br>(0.70-8.39)    | 0.17    | 0.98<br>(0.25-3.79)    | 0.98    | 6.26<br>(3.3-11.88)  | <0.001  | 2.63<br>(0.80-8.65)  | 0.11    | 2.57<br>(1.12-5.89)   | 0.03    |
| <b>BRCA1</b>  | 0.64<br>(0.39-1.06)    | 0.09    | 2.09<br>(1.33-3.30)    | 0.002   | 3.22<br>(1.73-5.99)    | <0.001  | 7.88<br>(6.26-9.93)  | <0.001  | 3.85<br>(2.49-5.93)  | <0.001  | 12.25<br>(7.57-19.82) | <0.001  |
| <b>BRCA2</b>  | 0.65<br>(0.46-0.92)    | 0.02    | 0.52<br>(0.30-0.92)    | 0.02    | 0.80<br>(0.43-1.50)    | 0.49    | 1.38<br>(1.10-1.73)  | 0.005   | 2.64<br>(1.48-4.71)  | 0.001   | 2.11<br>(1.46-3.05)   | <0.001  |
| <b>BRIP1</b>  | 0.80<br>(0.31-2.07)    | 0.65    | 0.36<br>(0.05-2.66)    | 0.32    | 0.45<br>(0.05-3.88)    | 0.47    | 1.56<br>(0.85-2.86)  | 0.15    | 4.30<br>(0.57-32.51) | 0.16    | 1.95<br>(0.71-5.34)   | 0.20    |
| <b>CHEK2</b>  | 1.26<br>(0.95-1.67)    | 0.10    | 0.58<br>(0.33-1.02)    | 0.06    | 0.46<br>(0.25-0.84)    | 0.01    | 0.19<br>(0.11-0.31)  | <0.001  | 0.32<br>(0.15-0.67)  | 0.003   | 0.15<br>(0.08-0.26)   | <0.001  |
| <b>PALB2</b>  | 0.47<br>(0.24-0.94)    | 0.03    | 0.63<br>(0.26-1.54)    | 0.31    | 1.30<br>(0.43-3.89)    | 0.64    | 1.77<br>(1.26-2.48)  | 0.001   | 2.90<br>(1.16-7.28)  | 0.02    | 3.78<br>(1.86-7.67)   | <0.001  |
| <b>RAD51C</b> | 0.65<br>(0.15-2.86)    | 0.57    | 2.93<br>(0.97-8.83)    | 0.06    | 4.47<br>(0.82-24.49)   | 0.08    | 2.51<br>(1.20-5.21)  | 0.01    | 0.85<br>(0.28-2.61)  | 0.77    | 3.79<br>(0.85-16.86)  | 0.08    |
| <b>RAD51D</b> | 1.29<br>(0.14-11.72)   | 0.82    | 2.93<br>(0.32-26.48)   | 0.34    | 2.27<br>(0.14-36.37)   | 0.56    | 5.39<br>(1.57-18.47) | 0.007   | 1.85<br>(0.23-15.11) | 0.57    | 4.18<br>(0.51-34.20)  | 0.18    |
| <b>TP53</b>   | 2.85<br>(1.30-6.24)    | 0.009   | 3.57<br>(1.36-9.38)    | 0.01    | 1.25<br>(0.47-3.35)    | 0.66    | 1.15<br>(0.44-2.99)  | 0.78    | 0.32<br>(0.10-1.00)  | 0.05    | 0.41<br>(0.15-1.09)   | 0.07    |

\*: Polytomous regression analysis adjusted for age at diagnosis.

OR: odds ratio; 95% CI: 95% confidence interval

**Supplementary Table 9: Case-control associations between gene mutations in breast cancer subtypes and reference controls in non-Hispanic whites\***

| Gene                  | ER+/HER2- |            |          |       |             |         |             | ER+/HER2+ |            |          |       |            |         |             |  |
|-----------------------|-----------|------------|----------|-------|-------------|---------|-------------|-----------|------------|----------|-------|------------|---------|-------------|--|
|                       | No. mut   | No. tested | Freq (%) | OR    | 95% C.I.    | p value | Adj p value | No. mut   | No. tested | Freq (%) | OR    | 95% C.I.   | p value | Adj p value |  |
| <i>ATM</i>            | 115       | 10542      | 1.1      | 2.64  | 2.10-3.31   | <0.001  | <0.001      | 35        | 2177       | 1.6      | 3.90  | 2.71-5.59  | <0.001  | <0.001      |  |
| <i>BARD1</i>          | 14        | 9881       | 0.1      | 1.39  | 0.75-2.53   | 0.25    | 0.68        | 7         | 2045       | 0.3      | 3.35  | 1.51-7.26  | 0.007   | 0.07        |  |
| <i>BRCA1</i>          | 88        | 13442      | 0.7      | 2.77  | 2.10-3.63   | <0.001  | <0.001      | 16        | 2823       | 0.6      | 2.40  | 1.41-4.00  | 0.003   | 0.03        |  |
| <i>BRCA2</i>          | 216       | 13442      | 1.6      | 5.19  | 4.24-6.36   | <0.001  | <0.001      | 36        | 2823       | 1.3      | 4.11  | 2.85-5.90  | <0.001  | <0.001      |  |
| <i>BRIP1</i>          | 29        | 9916       | 0.3      | 1.37  | 0.90-2.08   | 0.14    | 0.54        | 5         | 2049       | 0.2      | 1.14  | 0.44-2.74  | 0.63    | 1.00        |  |
| <i>CDH1</i>           | 14        | 13110      | 0.1      | 7.29  | 2.99-18.12  | <0.001  | <0.001      | 2         | 2756       | 0.1      | 4.95  | 0.76-24.58 | 0.08    | 0.48        |  |
| <i>CHEK2</i>          | 205       | 10533      | 2.0      | 2.30  | 1.95-2.71   | <0.001  | <0.001      | 63        | 2174       | 2.9      | 3.44  | 2.61-4.48  | <0.001  | <0.001      |  |
| <i>MSH6</i>           | 13        | 6143       | 0.2      | 2.08  | 1.10-3.78   | 0.03    | 0.15        | 4         | 1214       | 0.3      | 3.24  | 1.07-8.93  | 0.04    | 0.31        |  |
| <i>NBN</i>            | 31        | 9881       | 0.3      | 2.01  | 1.32-3.05   | 0.002   | 0.01        | 5         | 2045       | 0.2      | 1.56  | 0.60-3.83  | 0.26    | 1.00        |  |
| <i>NF1</i>            | 8         | 9713       | 0.1      | 2.29  | 0.94-5.32   | 0.06    | 0.29        | 5         | 2002       | 0.3      | 6.94  | 2.49-18.42 | 0.002   | 0.02        |  |
| <i>PALB2</i>          | 83        | 11145      | 0.7      | 4.34  | 3.22-5.87   | <0.001  | <0.001      | 9         | 2304       | 0.4      | 2.27  | 1.11-4.48  | 0.04    | 0.31        |  |
| <i>PTEN</i>           | 12        | 13477      | 0.1      | 16.43 | 4.71-68.17  | <0.001  | <0.001      | 1         | 2830       | 0.0      | 6.52  | 0.25-59.13 | 0.18    | 0.91        |  |
| <i>RAD51C</i>         | 13        | 9916       | 0.1      | 1.43  | 0.76-2.64   | 0.23    | 0.68        | 2         | 2049       | 0.1      | 1.07  | 0.18-4.04  | 0.71    | 1.00        |  |
| <i>RAD51D</i>         | 4         | 9748       | 0.0      | 0.99  | 0.31-2.82   | 1.00    | 1.00        | 1         | 2006       | 0.1      | 1.21  | 0.06-7.10  | 0.57    | 1.00        |  |
| <i>TP53</i>           | 11        | 13502      | 0.1      | 2.67  | 1.22-5.97   | 0.02    | 0.10        | 10        | 2837       | 0.4      | 11.58 | 4.98-26.08 | <0.001  | <0.001      |  |
| <b>Total Freq (%)</b> | 7.5       |            |          |       |             |         |             |           |            |          | 8.7   |            |         |             |  |
| Gene                  | ER-/HER2+ |            |          |       |             |         |             | TNBC      |            |          |       |            |         |             |  |
|                       | No. mut   | No. tested | Freq (%) | OR    | 95% C.I.    | p value | Adj p value | No. mut   | No. tested | Freq (%) | OR    | 95% C.I.   | p value | Adj p value |  |
| <i>ATM</i>            | 12        | 950        | 1.3      | 3.06  | 1.69-5.41   | <0.001  | 0.01        | 10        | 3571       | 0.3      | 0.67  | 0.35-1.25  | 0.28    | 0.55        |  |
| <i>BARD1</i>          | 2         | 895        | 0.2      | 2.19  | 0.38-8.23   | 0.24    | 1.00        | 27        | 3308       | 0.8      | 8.02  | 5.00-12.74 | <0.001  | <0.001      |  |
| <i>BRCA1</i>          | 17        | 1209       | 1.4      | 5.97  | 3.46-10.01  | <0.001  | <0.001      | 236       | 4561       | 5.2      | 22.39 | 18.06-27.8 | <0.001  | <0.001      |  |
| <i>BRCA2</i>          | 12        | 1209       | 1.0      | 3.20  | 1.76-5.72   | 0.001   | 0.009       | 107       | 4561       | 2.4      | 7.61  | 5.95-9.73  | <0.001  | <0.001      |  |
| <i>BRIP1</i>          | 1         | 897        | 0.1      | 0.52  | 0.03-2.90   | 1.00    | 1.00        | 15        | 3316       | 0.5      | 2.12  | 1.18-3.65  | 0.01    | 0.06        |  |
| <i>CDH1</i>           | 1         | 1182       | 0.1      | 5.78  | 0.26-36.83  | 0.18    | 1.00        | 1         | 4448       | 0.0      | 1.53  | 0.07-9.78  | 0.51    | 0.55        |  |
| <i>CHEK2</i>          | 12        | 949        | 1.3      | 1.49  | 0.83-2.65   | 0.16    | 1.00        | 14        | 3558       | 0.4      | 0.46  | 0.27-0.79  | 0.002   | 0.02        |  |
| <i>MSH6</i>           | 1         | 525        | 0.2      | 1.87  | 0.09-10.86  | 0.42    | 1.00        | 7         | 1905       | 0.4      | 3.62  | 1.63-7.83  | 0.005   | 0.04        |  |
| <i>NBN</i>            | 1         | 895        | 0.1      | 0.71  | 0.04-4.02   | 1.00    | 1.00        | 10        | 3308       | 0.3      | 1.93  | 0.98-3.68  | 0.07    | 0.21        |  |
| <i>NF1</i>            | 1         | 874        | 0.1      | 3.18  | 0.16-19.32  | 0.28    | 1.00        | 10        | 3246       | 0.3      | 8.57  | 3.69-18.35 | <0.001  | <0.001      |  |
| <i>PALB2</i>          | 5         | 991        | 0.5      | 2.94  | 1.13-7.15   | 0.03    | 0.36        | 50        | 3775       | 1.3      | 7.74  | 5.48-10.97 | <0.001  | <0.001      |  |
| <i>PTEN</i>           | 1         | 1213       | 0.1      | 15.22 | 0.59-138.00 | 0.08    | 0.75        | 0         | 4565       | 0.0      | N/A   | N/A        | N/A     | N/A         |  |
| <i>RAD51C</i>         | 3         | 897        | 0.3      | 3.66  | 0.97-11.41  | 0.05    | 0.54        | 9         | 3316       | 0.3      | 2.97  | 1.42-6.08  | 0.006   | 0.04        |  |
| <i>RAD51D</i>         | 1         | 876        | 0.1      | 2.76  | 0.14-16.28  | 0.31    | 1.00        | 6         | 3254       | 0.2      | 4.46  | 1.78-11.17 | 0.004   | 0.04        |  |
| <i>TP53</i>           | 5         | 1215       | 0.4      | 13.52 | 4.77-38.21  | <0.001  | 0.001       | 5         | 4580       | 0.1      | 3.58  | 1.26-10.11 | 0.02    | 0.09        |  |
| <b>Total Freq (%)</b> | 7.2       |            |          |       |             |         |             |           |            |          | 12.3  |            |         |             |  |

Mut: mutation; Freq: frequency; OR: odds ratio; 95% C.I.: 95% confidence interval; N/A: not applicable

\*: Fisher's exact test comparing mutation frequency by gene in breast cancer cases with gnomAD reference controls. Adj p-value: significance of association adjusted for multiple testing with false discovery rate (FDR) =0.1.

**Supplementary Table 10. Influence of PR status on associations between gene mutations and breast cancer subtypes in case-control analyses\***

| ER+/PR+/HER2+         |         |            |          |       |            |         |             | ER+/PR-/HER2+ |            |          |       |            |         |             |
|-----------------------|---------|------------|----------|-------|------------|---------|-------------|---------------|------------|----------|-------|------------|---------|-------------|
| Gene                  | No. mut | No. tested | Freq (%) | OR    | 95% C.I.   | p value | Adj p value | No. mut       | No. tested | Freq (%) | OR    | 95% C.I.   | p value | Adj p value |
| <i>ATM</i>            | 44      | 2761       | 1.6      | 4.66  | 3.38-6.35  | <0.001  | <0.001      | 12            | 640        | 1.9      | 5.49  | 3.04-9.79  | <0.001  | <0.001      |
| <i>BARD1</i>          | 5       | 2570       | 0.2      | 2.45  | 0.94-5.95  | 0.06    | 0.48        | 0             | 608        | 0.0      | 0.00  | 0.00-8.1   | 1.00    | 1.00        |
| <i>BRCA1</i>          | 22      | 3610       | 0.6      | 2.65  | 1.68-4.12  | <0.001  | 0.001       | 7             | 811        | 0.9      | 3.76  | 1.75-7.93  | 0.003   | 0.02        |
| <i>BRCA2</i>          | 60      | 3610       | 1.7      | 5.22  | 3.94-6.85  | <0.001  | <0.001      | 11            | 811        | 1.4      | 4.25  | 2.19-7.69  | <0.001  | 0.001       |
| <i>BRIP1</i>          | 7       | 2574       | 0.3      | 1.51  | 0.70-3.2   | 0.24    | 0.73        | 0             | 609        | 0.0      | N/A   | N/A        | N/A     | N/A         |
| <i>CDH1</i>           | 2       | 3542       | 0.1      | 4.55  | 0.74-18.36 | 0.08    | 0.50        | 0             | 785        | 0.0      | N/A   | N/A        | N/A     | N/A         |
| <i>CHEK2</i>          | 65      | 2759       | 2.4      | 3.53  | 2.72-4.56  | <0.001  | <0.001      | 9             | 637        | 1.4      | 2.11  | 1.04-4.01  | 0.05    | 0.18        |
| <i>MSH6</i>           | 3       | 1444       | 0.2      | 2.12  | 0.57-6.55  | 0.17    | 0.70        | 1             | 383        | 0.3      | 2.67  | 0.14-14.87 | 0.32    | 0.95        |
| <i>NBN</i>            | 6       | 2570       | 0.2      | 1.95  | 0.84-4.38  | 0.14    | 0.69        | 1             | 608        | 0.2      | 1.37  | 0.07-7.59  | 0.52    | 1.00        |
| <i>NF1</i>            | 7       | 2522       | 0.3      | 8.73  | 3.83-19.11 | <0.001  | <0.001      | 0             | 597        | 0.0      | N/A   | N/A        | N/A     | N/A         |
| <i>PALB2</i>          | 18      | 2945       | 0.6      | 3.66  | 2.23-5.95  | <0.001  | <0.001      | 4             | 676        | 0.6      | 3.54  | 1.20-9.44  | 0.03    | 0.15        |
| <i>PTEN</i>           | 2       | 3619       | 0.1      | 5.63  | 0.90-25.05 | 0.06    | 0.48        | 0             | 811        | 0.0      | N/A   | N/A        | N/A     | N/A         |
| <i>RAD51C</i>         | 2       | 2574       | 0.1      | 0.92  | 0.16-3.52  | 1.00    | 1.00        | 0             | 609        | 0.0      | N/A   | N/A        | N/A     | N/A         |
| <i>RAD51D</i>         | 1       | 2526       | 0.0      | 0.78  | 0.04-4.49  | 1.00    | 1.00        | 0             | 598        | 0.0      | N/A   | N/A        | N/A     | N/A         |
| <i>TP53</i>           | 12      | 3625       | 0.3      | 13.59 | 6.61-26.71 | <0.001  | <0.001      | 4             | 814        | 0.5      | 20.2  | 6.50-57.96 | <0.001  | 0.001       |
| <b>Total Freq (%)</b> | 8.6     |            |          |       |            |         |             |               |            |          | 7.0   |            |         |             |
| ER+/PR+/HER2-         |         |            |          |       |            |         |             | ER+/PR-/HER2- |            |          |       |            |         |             |
| Gene                  | No. mut | No. tested | Freq (%) | OR    | 95% C.I.   | p value | Adj p value | No. mut       | No. tested | Freq (%) | OR    | 95% C.I.   | p value | Adj p value |
| <i>ATM</i>            | 145     | 14073      | 1.0      | 3     | 2.48-3.63  | <0.001  | <0.001      | 19            | 1495       | 1.3      | 3.71  | 2.26-5.89  | <0.001  | <0.001      |
| <i>BARD1</i>          | 21      | 13100      | 0.2      | 2.02  | 1.24-3.24  | 0.007   | 0.03        | 2             | 1372       | 0.2      | 1.83  | 0.32-6.63  | 0.30    | 0.92        |
| <i>BRCA1</i>          | 113     | 17967      | 0.6      | 2.74  | 2.19-3.41  | <0.001  | <0.001      | 47            | 1915       | 2.5      | 10.80 | 7.86-14.74 | <0.001  | <0.001      |
| <i>BRCA2</i>          | 335     | 17967      | 1.9      | 5.86  | 5.05-6.79  | <0.001  | <0.001      | 42            | 1915       | 2.2      | 6.91  | 4.99-9.56  | <0.001  | <0.001      |
| <i>BRIP1</i>          | 36      | 13136      | 0.3      | 1.52  | 1.06-2.17  | 0.03    | 0.08        | 3             | 1381       | 0.2      | 1.21  | 0.33-3.64  | 0.74    | 1.00        |
| <i>CDH1</i>           | 18      | 17542      | 0.1      | 8.27  | 4.18-17.33 | <0.001  | <0.001      | 1             | 1867       | 0.1      | 4.32  | 0.21-28.5  | 0.22    | 0.92        |
| <i>CHEK2</i>          | 237     | 14057      | 1.7      | 2.52  | 2.18-2.91  | 0.001   | <0.001      | 22            | 1494       | 1.5      | 2.20  | 1.42-3.34  | 0.001   | 0.01        |
| <i>MSH6</i>           | 20      | 8080       | 0.3      | 2.53  | 1.53-4.04  | <0.001  | 0.003       | 0             | 896        | 0.0      | N/A   | N/A        | N/A     | N/A         |
| <i>NBN</i>            | 35      | 13100      | 0.3      | 2.23  | 1.52-3.26  | <0.001  | 0.001       | 5             | 1372       | 0.4      | 3.04  | 1.18-7.24  | 0.03    | 0.22        |
| <i>NF1</i>            | 12      | 12895      | 0.1      | 2.93  | 1.47-5.63  | 0.003   | 0.01        | 3             | 1356       | 0.2      | 6.96  | 1.82-21.02 | 0.011   | 0.10        |
| <i>PALB2</i>          | 117     | 14931      | 0.8      | 4.69  | 3.73-5.90  | <0.001  | <0.001      | 25            | 1584       | 1.6      | 9.49  | 6.13-14.43 | <0.001  | <0.001      |
| <i>PTEN</i>           | 13      | 18004      | 0.1      | 7.36  | 3.15-16.16 | <0.001  | <0.001      | 1             | 1918       | 0.1      | 5.31  | 0.25-33.09 | 0.18    | 0.92        |
| <i>RAD51C</i>         | 17      | 13136      | 0.1      | 1.53  | 0.89-2.55  | 0.12    | 0.24        | 3             | 1381       | 0.2      | 2.57  | 0.69-7.57  | 0.12    | 0.70        |
| <i>RAD51D</i>         | 7       | 12931      | 0.1      | 1.07  | 0.48-2.29  | 0.84    | 0.84        | 1             | 1365       | 0.1      | 1.45  | 0.07-8.32  | 0.50    | 1.00        |
| <i>TP53</i>           | 16      | 18039      | 0.1      | 3.64  | 1.95-6.82  | <0.001  | 0.001       | 2             | 1924       | 0.1      | 4.26  | 0.73-16.01 | 0.09    | 0.61        |
| <b>Total Freq (%)</b> | 7.5     |            |          |       |            |         |             |               |            |          | 10.4  |            |         |             |
| ER-/PR+/HER2+         |         |            |          |       |            |         |             | ER-/PR-/HER2+ |            |          |       |            |         |             |
| Gene                  | No. mut | No. tested | Freq (%) | OR    | 95% C.I.   | p value | Adj p value | No. mut       | No. tested | Freq (%) | OR    | 95% C.I.   | p value | Adj p value |
| <i>ATM</i>            | 1       | 78         | 1.3      | 3.74  | 0.19-20.76 | 0.24    | 0.24        | 15            | 1475       | 1.0      | 2.96  | 1.71-4.93  | <0.001  | 0.004       |
| <i>BARD1</i>          | 0       | 72         | 0.0      | N/A   | N/A        | N/A     | N/A         | 4             | 1378       | 0.3      | 3.65  | 1.22-9.60  | 0.03    | 0.24        |
| <i>BRCA1</i>          | 0       | 107        | 0.0      | N/A   | N/A        | N/A     | N/A         | 28            | 1883       | 1.5      | 6.50  | 4.35-9.56  | <0.001  | <0.001      |
| <i>BRCA2</i>          | 0       | 107        | 0.0      | N/A   | N/A        | N/A     | N/A         | 25            | 1883       | 1.3      | 4.16  | 2.74-6.26  | <0.001  | <0.001      |

|                       |   |     |     |      |            |      |      |    |      |     |       |             |        |        |
|-----------------------|---|-----|-----|------|------------|------|------|----|------|-----|-------|-------------|--------|--------|
| <b>BRIP1</b>          | 0 | 72  | 0.0 | N/A  | N/A        | N/A  | N/A  | 1  | 1382 | 0.1 | 0.40  | 0.02-2.37   | 0.53   | 1.00   |
| <b>CDH1</b>           | 0 | 103 | 0.0 | N/A  | N/A        | N/A  | N/A  | 1  | 1843 | 0.1 | 4.37  | 0.21-28.88  | 0.22   | 1.00   |
| <b>CHEK2</b>          | 1 | 78  | 1.3 | 1.91 | 0.10-10.57 | 0.41 | 0.41 | 13 | 1473 | 0.9 | 1.31  | 0.73-2.29   | 0.33   | 1.00   |
| <b>MSH6</b>           | 0 | 45  | 0.0 | N/A  | N/A        | N/A  | N/A  | 1  | 791  | 0.1 | 1.29  | 0.07-7.17   | 0.54   | 1.00   |
| <b>NBN</b>            | 0 | 72  | 0.0 | N/A  | N/A        | N/A  | N/A  | 2  | 1378 | 0.2 | 1.21  | 0.21-4.58   | 0.68   | 1.00   |
| <b>NF1</b>            | 0 | 71  | 0.0 | N/A  | N/A        | N/A  | N/A  | 2  | 1356 | 0.2 | 4.64  | 0.80-18.15  | 0.07   | 0.59   |
| <b>PALB2</b>          | 0 | 82  | 0.0 | N/A  | N/A        | N/A  | N/A  | 8  | 1550 | 0.5 | 3.09  | 1.42-6.16   | 0.006  | 0.06   |
| <b>PTEN</b>           | 0 | 107 | 0.0 | N/A  | N/A        | N/A  | N/A  | 2  | 1887 | 0.1 | 10.8  | 1.73-48.07  | 0.02   | 0.19   |
| <b>RAD51C</b>         | 0 | 72  | 0.0 | N/A  | N/A        | N/A  | N/A  | 3  | 1382 | 0.2 | 2.57  | 0.69-7.56   | 0.12   | 0.82   |
| <b>RAD51D</b>         | 0 | 71  | 0.0 | N/A  | N/A        | N/A  | N/A  | 1  | 1360 | 0.1 | 1.46  | 0.07-8.35   | 0.50   | 1.00   |
| <b>TP53</b>           | 0 | 107 | 0.0 | N/A  | N/A        | N/A  | N/A  | 12 | 1890 | 0.6 | 26.10 | 12.68-51.35 | <0.001 | <0.001 |
| <b>Total Freq (%)</b> |   |     | 2.6 |      |            |      |      |    |      | 7.1 |       |             |        |        |

| Gene                  | ER-/PR+/HER2- |            |          |       |             |         |             | ER-/PR-/HER2- |            |          |       |             |         |             |
|-----------------------|---------------|------------|----------|-------|-------------|---------|-------------|---------------|------------|----------|-------|-------------|---------|-------------|
|                       | No. mut       | No. tested | Freq (%) | OR    | 95% C.I.    | p value | Adj p value | No. mut       | No. tested | Freq (%) | OR    | 95% C.I.    | p value | Adj p value |
| <b>ATM</b>            | 2             | 158        | 1.3      | 3.69  | 0.65-13.85  | 0.10    | 0.31        | 13            | 6117       | 0.2      | 0.62  | 0.34-1.06   | 0.09    | 0.18        |
| <b>BARD1</b>          | 0             | 142        | 0.0      | N/A   | N/A         | N/A     | N/A         | 48            | 5670       | 0.9      | 10.70 | 7.49-15.26  | <0.001  | <0.001      |
| <b>BRCA1</b>          | 13            | 228        | 5.7      | 25.47 | 13.80-45.05 | <0.001  | <0.001      | 459           | 7896       | 5.8      | 26.00 | 22.34-30.19 | <0.001  | <0.001      |
| <b>BRCA2</b>          | 8             | 228        | 3.5      | 11.12 | 5.12-22.13  | <0.001  | <0.001      | 199           | 7896       | 2.5      | 7.95  | 6.68-9.44   | <0.001  | <0.001      |
| <b>BRIP1</b>          | 1             | 142        | 0.7      | 3.92  | 0.20-21.72  | 0.23    | 0.45        | 24            | 5680       | 0.4      | 2.35  | 1.51-3.60   | <0.001  | 0.002       |
| <b>CDH1</b>           | 0             | 222        | 0.0      | N/A   | N/A         | N/A     | N/A         | 4             | 7715       | 0.1      | 4.18  | 1.28-12.63  | 0.02    | 0.10        |
| <b>CHEK2</b>          | 1             | 157        | 0.6      | 0.95  | 0.05-5.56   | 1.00    | 1.00        | 22            | 6101       | 0.4      | 0.54  | 0.35-0.82   | 0.002   | 0.01        |
| <b>MSH6</b>           | 0             | 78         | 0.0      | N/A   | N/A         | N/A     | NA          | 9             | 3233       | 0.3      | 2.84  | 1.39-5.53   | 0.006   | 0.04        |
| <b>NBN</b>            | 0             | 142        | 0.0      | N/A   | N/A         | N/A     | NA          | 12            | 5670       | 0.2      | 1.77  | 0.97-3.18   | 0.08    | 0.18        |
| <b>NF1</b>            | 0             | 139        | 0.0      | N/A   | N/A         | N/A     | NA          | 10            | 5585       | 0.2      | 5.63  | 2.68-11.17  | <0.001  | <0.001      |
| <b>PALB2</b>          | 2             | 176        | 1.1      | 6.82  | 1.20-25.86  | 0.04    | 0.18        | 84            | 6501       | 1.3      | 7.76  | 5.98-10.02  | <0.001  | <0.001      |
| <b>PTEN</b>           | 0             | 227        | 0.0      | N/A   | N/A         | N/A     | N/A         | 3             | 7901       | 0.0      | 3.87  | 0.93-13.49  | 0.06    | 0.18        |
| <b>RAD51C</b>         | 0             | 142        | 0.0      | N/A   | N/A         | N/A     | N/A         | 19            | 5680       | 0.3      | 3.96  | 2.40-6.51   | <0.001  | <0.001      |
| <b>RAD51D</b>         | 1             | 139        | 0.7      | 14.28 | 0.72-83.06  | 0.07    | 0.28        | 12            | 5595       | 0.2      | 4.25  | 2.24-7.82   | <0.001  | 0.001       |
| <b>TP53</b>           | 0             | 228        | 0.0      | N/A   | N/A         | N/A     | N/A         | 6             | 7921       | 0.1      | 3.11  | 1.26-7.31   | 0.02    | 0.10        |
| <b>Total Freq (%)</b> |               |            | 13.7     |       |             |         |             |               |            | 12.9     |       |             |         |             |

Mut: mutation; Freq: frequency; OR: odds ratio; 95% C.I.: 95% confidence interval; N/A: not applicable

\*: Logistic regression by comparing each gene mutation frequency with gnomAD reference controls, weighted by race and ethnicity. Adj p-value: significance of association adjusted for multiple testing with false discovery rate (FDR) =0.1.

**Supplementary Table 11. Lifetime absolute risk estimation by subtype for each predisposition gene in non-Hispanic whites\***

| Gene                   | Case Freq | OR (95% CI)         |                       |                       |                      |                     | Absolute risk at age 85 |           |           |      |      |
|------------------------|-----------|---------------------|-----------------------|-----------------------|----------------------|---------------------|-------------------------|-----------|-----------|------|------|
|                        |           | HR+/HER2-           | HR+/HER2+             | HR-/HER2+             | TNBC                 | BC                  | HR+/HER2-               | HR+/HER2+ | HR-/HER2+ | TNBC | BC   |
| <i>ATM</i>             | 0.5%      | 2.77<br>(2.22-3.45) | 4.02<br>(2.79-5.69)   | 3.3<br>(1.82-5.84)    | 0.67<br>(0.35-1.25)  | 2.73<br>(2.28-3.28) | 0.23                    | 0.04      | 0.01      | 0.01 | 0.28 |
| <i>BARD1</i>           | 0.1%      | 1.47<br>(0.82-2.62) | 3.28<br>(1.48-7.09)   | 3.55<br>(0.94-10.95)  | 8.61<br>(5.42-13.46) | 2.83<br>(1.95-4.12) | 0.13                    | 0.03      | 0.01      | 0.09 | 0.29 |
| <i>BRCA1</i>           | 0.8%      | 3.45<br>(2.68-4.46) | 2.63<br>(1.57-4.31)   | 8.72<br>(5.48-13.56)  | 26<br>(21.11-32.20)  | 7.98<br>(6.58-9.68) | 0.23                    | 0.02      | 0.03      | 0.22 | 0.57 |
| <i>BRCA2</i>           | 0.9%      | 5.92<br>(4.87-7.21) | 4.34<br>(3.03-6.18)   | 3.73<br>(2.02-6.64)   | 8.33<br>(6.56-10.60) | 6.55<br>(5.52-7.79) | 0.40                    | 0.04      | 0.01      | 0.07 | 0.52 |
| <i>CHEK2</i>           | 0.9%      | 2.65<br>(2.26-3.10) | 3.57<br>(2.76-4.63)   | 1.34<br>(0.71-2.51)   | 0.49<br>(0.29-0.82)  | 2.31<br>(2.02-2.64) | 0.23                    | 0.04      | 0.01      | 0.01 | 0.24 |
| <i>PALB2</i>           | 0.4%      | 4.7<br>(3.51-6.29)  | 2.22<br>(1.08-4.38)   | 3.17<br>(1.22-7.72)   | 8.36<br>(5.95-11.69) | 5.28<br>(4.14-6.78) | 0.34                    | 0.02      | 0.01      | 0.07 | 0.45 |
| <i>RAD51C</i>          | 0.1%      | 1.75<br>(0.96-3.10) | 1.04<br>(0.18-3.95)   | 5.27<br>(1.74-13.90)  | 4.29<br>(2.26-7.91)  | 2.28<br>(1.50-3.44) | 0.15                    | 0.01      | 0.02      | 0.04 | 0.21 |
| <i>RAD51D</i>          | 0.0%      | 1.23<br>(0.45-3.14) | 1.18<br>(0.06-6.93)   | 2.98<br>(0.15-17.59)  | 5.21<br>(2.15-12.18) | 1.84<br>(0.93-3.55) | 0.11                    | 0.01      | 0.01      | 0.06 | 0.20 |
| <i>TP53</i>            | 0.1%      | 3.36<br>(1.65-6.97) | 13.55<br>(6.28-29.42) | 17.47<br>(6.76-45.40) | 4.3<br>(1.66-11.15)  | 5.57<br>(3.15-9.82) | 0.24                    | 0.12      | 0.06      | 0.04 | 0.42 |
| <i>SEER estimates†</i> |           |                     |                       |                       |                      |                     | 0.10                    | 0.01      | 0.004     | 0.01 | 0.12 |

\*: Limited to patients with available ER and/or PR and HER2 tumor status: HR+ (ER+ and/or PR+), HR- (ER- and PR-).

†: SEER estimates: SEER 2010-2015 breast cancer incidence rates.

OR: odds ratio; BC: overall breast cancer; 95% CI: 95% confidence interval
